# Supplementary material for: Intercropping With Peppermint Increases Ground Dwelling Insect and Pollinator Abundance and Decreases Drosophila suzukii in Fruit
Source: Frontiers journal article supplement (doi:10.3389/fsufs.2021.700842), 2021-10-21
Supplement: Table_1.docx [file Table_1.docx]

## Intercropping with peppermint increases ground dwelling insect and pollinator abundance and decreases *Drosophila suzukii* in fruit

Chelsea Megan Gowton,1* César Cabra-Arias1 and Juli Carrillo1

1. Plant Insect Ecology and Evolution Lab, Faculty of Land and Food Systems, Centre for Sustainable Food Systems, Biodiversity Research Centre, The University of British Columbia, Unceded xʷməθkʷəy̓əm Musqueam Territory, Vancouver, BC, Canada

*Correspondence:

Chelsea Megan Gowton

cgowton@mail.ubc.ca

ORCID:

Chelsea Megan Gowton: 0000-0003-2443-0809

**Supplemental Table 1:** Insect families collected in Vernon pitfall traps placed in peppermint and ryegrass/clover intercrops.

| Insect Family | Order | Functional group | Reference |
| --- | --- | --- | --- |
| Aphididae (115) | Hemiptera | Herbivore | Coeur et al., 2010; Floate, 2010; Foottit et al., 2008. |
| Cercopidae (61) | Hemiptera | Herbivore | Cruz et al., 2009; Wilson, 1991. |
| Coreidae (1) | Hemiptera | Herbivore | Linares & Orozco, 2017; Fernandes et al., 2015 Mitchell & Mitchell, 1986. |
| Curculionidae (18) | Coleoptera | Herbivore | Bousquet, 1990; Douglas et al., 2013; Kuhn et al., 2013; Prena, 2018. |
| Cynipidae (2) | Hymenoptera | Herbivore | LeBlanc & Lacroix, 2001; Stone et al., 2002. |
| Elateridae (14) | Coleoptera | Herbivore | Douglas, 2011; Majka & Johnson, 2008; van Herk & Vernon, 2014. |
| Nitidulidae (49) | Coleoptera | Herbivore | Bousquet, 1990; Loughner et al., 2007; Zeran et al., 2006. |
| Thripidae (2) | Thysanoptera | Herbivore | Foottit & Maw, 2019; O’Neil & Bigelow, 1964; Pearsall, 2000. |
| Nabidae (1) | Hemiptera | Predator | Lattin, 1989; Swanson, 2012. |
| Staphylinidae (29) | Coleoptera | Predator | Betz et al., 2018; Frank & Thomas, 1999. |
| Carabidae (239) | Coleoptera | Predator | Bousquet, 1990; Holliday et al., 2018; Majka et al., 2007. |
| Braconidae (3) | Hymenoptera | Predator | Fernandez-Triana, 2014; Sharanowski et al., 2014. |
| Formicidae (35) | Hymenoptera | Predator | Lange et al., 2008; Smith et al., 2015. |
|  | Collembola (246) | Detritivore | Cipola et al., 2018; Turnbull & Stebaeva, 2019. |
| Dermestidae (1) | Coleoptera | Detritivore | Bousquet, 1990; Zhantiev, 2009. |
| Silphidae (25) | Coleoptera | Detritivore | Louzada & Nichols, 2012; Majka, 2011; Monk et al., 2016. |
| Tenebrionidae (3) | Coleoptera | Detritivore | Bousquet, 1990; Bouchard & Bousquet, 2014. |

**Supplemental References:**

Betz, O., U. Irmler, and J. Klimaszewski. Biology of Rove Beetles (Staphylinidae). Life history, Evolution, Ecology, and Distribution. Cham: Springer. doi:10.1007/978-3-319-70257-5

Bland, R.G., and H.E. Jaques. (2010). How to know the insects. Long Grove, IL: Waveland Press.

Bouchard, P., and Y. Bousquet. (2014). Darkling Beetles (Coleoptera: Tenebrionidae) of Canadian Grasslands. In Arthropods of Canadian Grasslands (Volume 4): Biodiversity and Systematics Part 2. ed. D.J. Giberson, and H.A. Carcamo (Montreal, QC: Biological Survey of Canada), 119-140. doi: <http://dx.doi.org/10.3752/9780968932179.ch3>

Bousquet, Y. (1990). Beetles associated with stored products in Canada: An identification guide. Agriculture and Agri-Food Canada. Available from: <http://esc-sec.ca/wp/wp-content/uploads/2017/03/AAFC_bousquet1990.pdf>

Borror, D.J., and R.E. White. (1970) A Field Guide to the Insects of America North of Mexico. Boston: Houghton Mifflin Company.

Castner, J.L. (2000). Photographic atlas of entomology and guide to insect identification. Gainesville, FL: Feline Press.

Cipola, N.G., D.D. da Silva, and B.C. Bellini. (2018). “Class Collembola,” in Thorp and Covich’s Freshwater Invertebrates, ed. J. Thorp, and C. Rogers (Cambridge, MA: Academic Press) 11–55. doi:10.1016/b978-0-12-804223-6.00002-0

Cruz, I., I. Fernandes, C. Souza, M.D.L. Correa, M.M Contijo, and R.B. Da Silva. (2009). Damage of the spittlebug *Deois flavopicta* (Stal) (Hemiptera: Cercopidae) to maize in intercropping system with B*rachiaria* grass. *Revista Brasileira de Milho e Sorgo* 8 (2): 117-130. doi: 10.18512/1980-6477/rbms.v8n2p117-130

Coeur d’Acier, A., N. Pérez-Hidalgo, and O. Petrović-Obradović. (2010). Aphids (Hemiptera, Aphididae) *BioRisk* 4: 435–474. doi:10.3897/biorisk.4.57

Douglas, H., P. Bouchard, R. Anderson, P. De Tonnancour, R. Vigneault, and R. Webster. (2013). New Curculionoidea (Coleoptera) records for Canadа. *ZooKeys* 309: 13–48. doi:10.3897/zookeys.309.4667

Douglas, H. (2011). New records of European wireworm pests and other click beetles (Coleoptera: Elateridae) in Canada and USA. *The Journal of The Entomological Society of Ontario* 142: 11-17

Fernandes, J.A.M., P.L. Mitchell, L. Livermore, and M. Nikunlassi. (2015). “Leaf-Footed Bugs (Coreidae),” in True Bugs (Heteroptera) of the Neotropics, ed. A.R. Panizzi, and J. Grazia (Dordrecht: Springler) 549–605. doi:10.1007/978-94-017-9861-7_19

Fernandez-Triana, J.L. (2014). Towards the conservation of parasitoid wasp species in Canada: Preliminary assessment of Microgastrinae (Hymenoptera: Braconidae). *Biodiversity Data Journal* 2 (2): 1-34. doi: 10.3897/BDJ.2.e1067

Floate, K.D. (2010). “Gall-inducing aphids and mites associated with the hybrid complex of cottonwoods, *Populus* spp. (Salicaceae) on Canada's grasslands,” *i*n Arthropods of Canadian Grasslands (Volume 1): Ecology and Interactions in Grassland Habitats, ed. J.D. Shorthouse, and K.D. Floate (Montreal, QC: Biological Survey of Canada), 281-300. doi:10.3752/9780968932148.ch13

Foottit, R.G., and H.E.L. Maw. (2018). Thysanoptera of Canada. *Zookeys* 819: 291-294. doi: 10.3897/zookeys.819.26576

Foottit, R.G., H.E.L. Maw, C.D. Von Dohlen, and P.D.N. Hebert. (2008). Species identification of aphids (Insecta: Hemiptera: Aphididae) through DNA barcodes. *Molecular Biology Resources* 8: 1189-1201. doi: 10.1111/j.1755-0998.2008.02297.x

Frank. J.H., and M.C. Thomas. (1999) Rove beetles of the world, Staphylinidae (Insecta: Coleoptera: Staphylinidae). University of Florida. IFAS extension 1-8. doi: 10.32473/edis-in271-2002

Holliday, N., K.D. Floate, H. Carcamo, and D.A. Pollock. (2014). “Ground beetles (Coleoptera: Carabidae) of the Praire Grasslands of Canada,” in Arthropods of Canadian Grasslands (Volume 4): Biodiversity and Systematics Part 2, ed. D.J. Giberson, and H.A. Carcamo (Montreal, QC: Biological Survey of Canada), 1-85. Doi: 10.3752/9780968932179.ch1

Kuhn, W.R., R.R. Youngman, S. Wu, and C.A. Laub. (2013). Ecology, Taxonomy, and Pest Management of Billbugs (Coleoptera: Curculionidae) in Orchard grass of Virginia. *Journal of Integrated Pest Management* 4 (3): 1–5. doi:10.1603/ipm12022

Lange, D., W.D. Fernandes, J. Raizer, and O. Faccenda. (2008). Predacious Activity of Ants (Hymenoptera: Formicidae) in Conventional and in No-till Agriculture Systems. *Brazilian Archives of Biology and Technology* 51 (6): 1199-1207. doi: 10.1590/S1516-89132008000600015

Lattin, J.D. (1989). Bionomics of the Nabidae. *Annual Review of Entomology* 34: 383- 400. doi: 10.1146/annurev.en.34.010189.002123

Linares, C., and J. Orozco. (2017). The Coreidae of Honduras (Hemiptera: Coreidae). *Biodiversity Data Journal* 5: 1-23. <https://doi.org/10.3897/BDJ.5.e13067>

LeBlanc, D.A., and C.R. Lacroix. (2001). Developmental Potential of Galls Induced by *Diplolepis rosaefolii* (Hymenoptera: Cynipidae) on the Leaves of *Rosa virginiana* and the Influence of *Periclistus* Species on the *Diplolepis rosaefolii* Galls. *International Journal of Plant Sciences* 162 (1): 29–46. doi:10.1086/317900

Loughner, R.L., G.M. Loeb, K. Demchak, and S. Schloemann. (2007). Evaluation of Strawberry Sap Beetle (Coleoptera: Nitidulidae) Use of Habitats Surrounding Strawberry Plantings as Food Resources and Overwintering Sites. *Environmental Entomology* 36 (5): 1059–1065. doi:10.1603/0046-225x(2007)36[1059:eossbc]2.0.co;2

Louzada, J., and E.S. Nichols. (2012). “Detritivorous Insects,” in Insect Bioecology and Nutrition for Integrated Pest Management, ed. A.R. Panzini, and J.R.P. Parra (Sao Paulo: CRC Press) 397–415*.* doi:10.1201/b11713-20

Majka, C.G. (2011). The Silphidae (Coleoptera) of the maritime provinces of Canada. *Acadian Entomological Society* 7: 83-101

Majka, C.G., and P.J. Johnson. (2008). The Elateridae (Coleoptera) of the Maritime Provinces of Canada: faunal composition, new records, and taxonomic changes. *Zootaxa* 1811 (1), 1-30. doi:10.11646/zootaxa.1811.1.1

Mitchell, P.L., and F.L. Mitchell. (1986). Parasitism and Predation of Leaf footed Bug (Hemiptera: Heteroptera: Coreidae) Eggs. *Annals of the Entomological Society of America* 79 (6): 854–860. doi:10.1093/aesa/79.6.854

Monk, E., K. Hinson, T. Szewczyk, H. D’Oench, and C.M. McCain. (2016) Key to the carrion beetles (Silphidae) of Colorado & neighboring states. University of Colorado, Department of Ecology & Evolutionary Biology. doi:[10.13140/RG.2.2.28031.30883](http://dx.doi.org/10.13140/RG.2.2.28031.30883)

Turnbull, M.S., and S. Stebaeva. (2019). Collembola of Canada. *ZooKeys* 819: 187-195. doi.org/10.3897/zookeys.819.23653

O’Neil, K., and R.S. Bigelow. (1964). The Taeniothrips of Canada. *The Canadian Entomologist* 96: 1219-1239. doi.org/10.4039/Ent961219-9

Pearsall, I.A. (2000). Damage to Nectarines by the Western Flower Thrips (Thysanoptera: Thripidae) in the Interior of British Columbia. *Journal of Economic Entomology* 93 (4): 1207-1215. doi:10.1603/0022-0493-93.4.1207

Prena, J. (2017). Orchid weevils (Coleoptera: Curculionidae) in Canada. *The Canadian Entomologist* 149 (1): 38–47. doi:10.4039/tce.2016.56

Sharanowski, B., Y.M. Zhang, and U. Wanigasekara. (2014). “Annotated Checklist of Braconidae (Hymenoptera) in the Canadian Prairies Ecozone,” in Arthropods of Canadian Grasslands (Volume 4): Biodiversity and Systematics Part 2, ed. D.J. Giberson, and H.A. Carcamo (Montreal, QC: Biological Survey of Canada), 399-425. doi:<http://dx.doi.org/10.3752/9780968932179.ch10>

Smith, M.A., A. Boyd, T. Bringloe, C. Britton-Foster, H. Cahill, K. Desnoyers, N. Duitshaever, D. Gibson, S. James, Y. Jeong, D. Kelly, E. Levene, E. Lyttle, T. Masse, K. Pare, K. Paris, C. Russell, E. Scott, D. Silva, M. Sparkes, K. Valkova, and S.J. Adamowicz. (2015). The northward distribution of ants (Hymenoptera: Formicidae) 40 years later: revisiting Robert E. Gregg’s 1969 Subarctic collection sites in Churchill, Manitoba, Canada. *The Canadian Entomologist* 148 (03): 307–315. doi:10.4039/tce.2015.53

Stone, G.N., K. Schönrogge, R.J. Atkinson, D. Bellido, and J. Pujade-Villar. (2002). The population biology of oak gall wasps (Hymenoptera: Cynipidae). *Annual Review of Entomology* 47 (1): 633–668. doi:10.1146/annurev.ento.47.091201.145247

Swanson, D.R. (2012). A Synopsis of the Damsel Bugs (Heteroptera: Nabidae) of Michigan. *The Great Lakes Entomologist* 45 (1-2): 40-55.

van Herk, W.G., and R.S. Vernon. (2014). “Click Beetles and Wireworms (Coleoptera: Elateridae) of Alberta, Saskatchewan, and Manitoba,” in Arthropods of Canadian Grasslands (Volume 4): Biodiversity and Systematics Part 2, ed. D.J. Giberson, and H.A. Carcamo (Montreal, QC: Biological Survey of Canada), 87-117. doi:<http://dx.doi.org/10.3752/9780968932179.ch2>

Wilson, L.F. (1991). Pine Spittlebug Its Ecology and Management. United States Department of Agriculture. Agriculture Handbook 695 Available from: https://naldc.nal.usda.gov/download/CAT92966270/PDF

Zeran, R.M., R.S. Anderson, and T.A. Wheeler. (2006) Sap beetles (Coleoptera: Nitidulidae) in managed and old-growth forests in southeastern Ontario, Canada. *The Canadian Entomologist* 138 (02): 123–137. doi:10.4039/n04-112

Zhantiev, R.D. (2009). Ecology and classification of dermestid beetles (Coleoptera, Dermestidae) of the Palaearctic fauna. *Entomological Review* 89 (2): 157–174. doi:10.1134/s0013873809020055
